# Supplementary material
Source: PubMed Central journal article supplement (PMC4785015)
Supplement: NIHMS765417-supplement-Supplement.pdf [file NIHMS765417-supplement-Supplement.pdf]

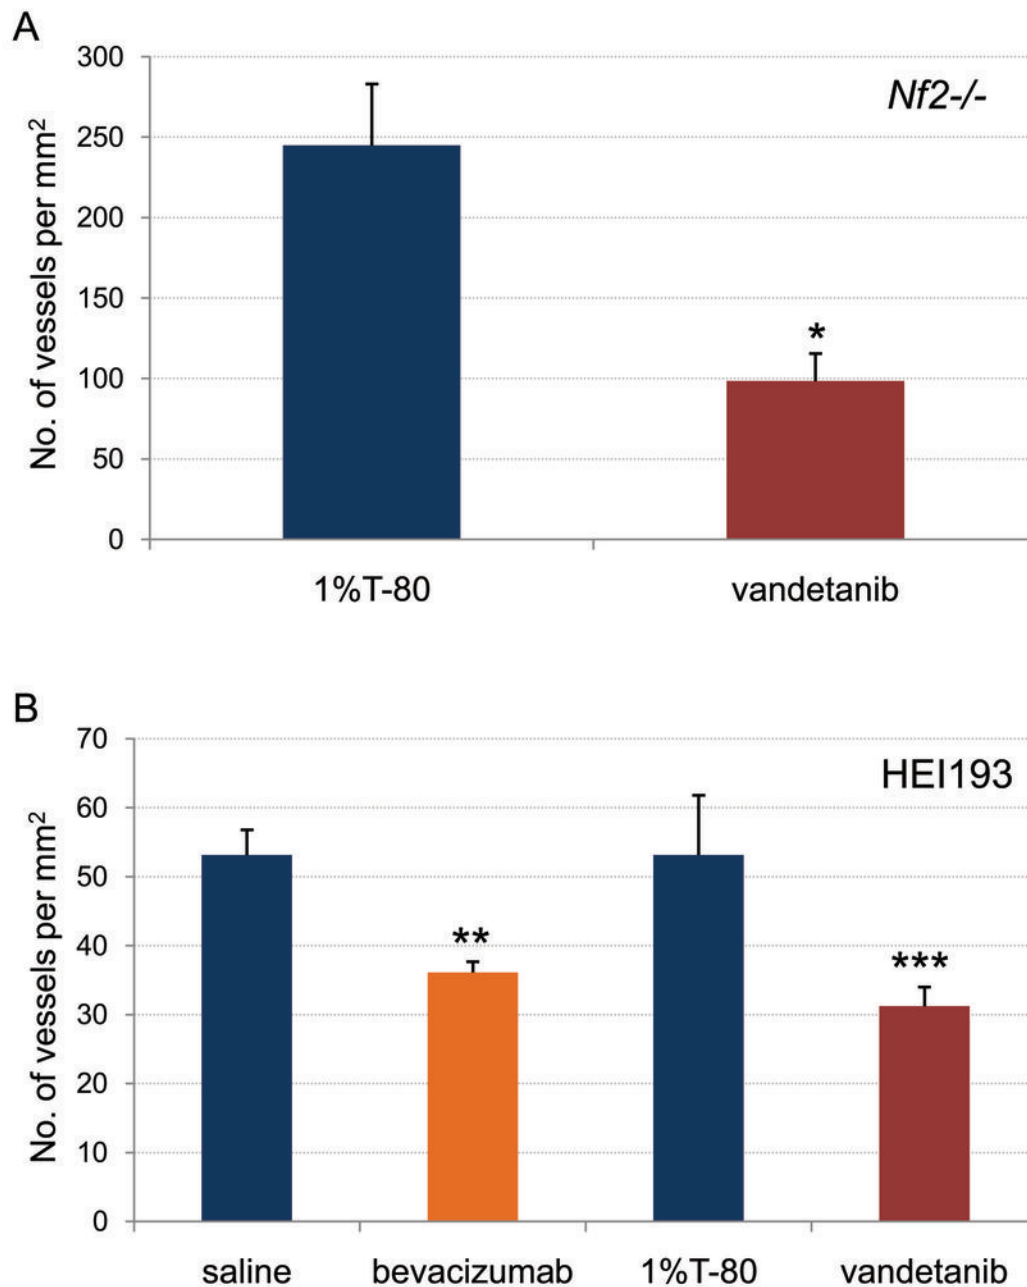

Fig S1. Anti-VEGF therapies reduce no. of CD31-positive vessels in schwannoma. Vandetanib reduced no. of CD31-positive vessels in *Nf2-/-* by 62% (A). Both bevacizumab and vandetanib also produced similar anti-angiogenic outcome, where a 50% decrease of CD31-positive vessels was observed (B). All n=4; \* $p=0.013$ , \*\* $p=0.0055$  and \*\*\* $p=0.046$ .
